# Supplementary material
Source: publisher figshare collection journal article supplement (https://acs.figshare.com/ndownloader/files/5184694)
Supplement: Supplementary file 1 [file 5184694]

 
data_{(NMe2)Mo[OSi(OtBu)3][O2P(OtBu)2]}2_compound5a 
 
_audit_creation_method            SHELXL 
_chemical_name_systematic 
; 
 ? 
; 
_chemical_name_common             ? 
_chemical_formula_moiety          'C44 H102 Mo2 N2 O16 P2 Si2' 
_chemical_formula_structural      ? 
_chemical_formula_analytical      ? 
_chemical_formula_sum             'C44 H102 Mo2 N2 O16 P2 Si2' 
_chemical_formula_weight          1225.28 
_chemical_melting_point           ? 
_chemical_compound_source         ? 
 
loop_ 
 _atom_type_symbol 
 _atom_type_description 
 _atom_type_scat_dispersion_real 
 _atom_type_scat_dispersion_imag 
 _atom_type_scat_source 
 'C'  'C'   0.0033   0.0016 
 'International Tables Vol C Tables 4.2.6.8 and 6.1.1.4' 
 'H'  'H'   0.0000   0.0000 
 'International Tables Vol C Tables 4.2.6.8 and 6.1.1.4' 
 'N'  'N'   0.0061   0.0033 
 'International Tables Vol C Tables 4.2.6.8 and 6.1.1.4' 
 'O'  'O'   0.0106   0.0060 
 'International Tables Vol C Tables 4.2.6.8 and 6.1.1.4' 
 'Si'  'Si'   0.0817   0.0704 
 'International Tables Vol C Tables 4.2.6.8 and 6.1.1.4' 
 'P'  'P'   0.1023   0.0942 
 'International Tables Vol C Tables 4.2.6.8 and 6.1.1.4' 
 'Mo'  'Mo'  -1.6832   0.6857 
 'International Tables Vol C Tables 4.2.6.8 and 6.1.1.4' 
 
_symmetry_cell_setting            'monoclinic' 
_symmetry_space_group_name_H-M    'C2/m' 
 
loop_ 
 _symmetry_equiv_pos_as_xyz 
 'x, y, z' 
 '-x, y, -z' 
 'x+1/2, y+1/2, z' 
 '-x+1/2, y+1/2, -z' 
 '-x, -y, -z' 
 'x, -y, z' 
 '-x+1/2, -y+1/2, -z' 
 'x+1/2, -y+1/2, z' 
 
_cell_length_a                    15.7641(13) 
_cell_length_b                    20.947(2) 
_cell_length_c                    10.0739(8) 
_cell_angle_alpha                 90.00 
_cell_angle_beta                  106.907(2) 
_cell_angle_gamma                 90.00 
_cell_volume                      3182.8(4) 
_cell_formula_units_Z             2 
_cell_measurement_temperature     129(2) 
_cell_measurement_reflns_used     2610 
_cell_measurement_theta_min       1.75 
_cell_measurement_theta_max       24.7 
 
_exptl_crystal_description        prism 
_exptl_crystal_colour             red 
_exptl_crystal_size_max           0.22 
_exptl_crystal_size_mid           0.16 
_exptl_crystal_size_min           0.14 
_exptl_crystal_density_meas       ? 
_exptl_crystal_density_diffrn     1.279 
_exptl_crystal_density_method     'not measured' 
_exptl_crystal_F_000              1300 
_exptl_absorpt_coefficient_mu     0.538 
_exptl_absorpt_correction_type    'empirical' 
_exptl_absorpt_correction_T_min   0.59185 
_exptl_absorpt_correction_T_max   0.96223 
_exptl_absorpt_process_details    'Blessing, 1995'
_exptl_special_details 
; 
 ? 
; 
 
_diffrn_ambient_temperature       129(2) 
_diffrn_radiation_wavelength      0.71073 
_diffrn_radiation_type            MoK\a 
_diffrn_radiation_source          'fine-focus sealed tube' 
_diffrn_radiation_monochromator   graphite 
_diffrn_measurement_device        'Bruker SMART CCD' 
_diffrn_measurement_method        \w-scans 
_diffrn_standards_number          ? 
_diffrn_standards_interval_count  ? 
_diffrn_standards_interval_time   ? 
_diffrn_standards_decay_%         ? 
_diffrn_reflns_number             7116 
_diffrn_reflns_av_R_equivalents   0.0518 
_diffrn_reflns_av_sigmaI/netI     0.0685 
_diffrn_reflns_limit_h_min        -18 
_diffrn_reflns_limit_h_max        11 
_diffrn_reflns_limit_k_min        -23 
_diffrn_reflns_limit_k_max        23 
_diffrn_reflns_limit_l_min        -11 
_diffrn_reflns_limit_l_max        11 
_diffrn_reflns_theta_min          1.66 
_diffrn_reflns_theta_max          24.69 
_reflns_number_total              2697 
_reflns_number_observed           2046 
_reflns_observed_criterion        >2sigma(I) 
 
_computing_data_collection        'Bruker SMART' 
_computing_cell_refinement        'Bruker SMART' 
_computing_data_reduction         'Bruker SAINT' 
_computing_structure_solution     'SHELXTL-XS (Bruker, 1995)' 
_computing_structure_refinement   'SHELXTL-XL (Bruker, 1995)' 
_computing_molecular_graphics     'SHELXTL-XP (Bruker, 1995)'
_computing_publication_material   ? 
 
_refine_special_details 
; 
 Refinement on F^2^ for ALL reflections except for 0 with very negative F^2^ 
 or flagged by the user for potential systematic errors.  Weighted R-factors 
 wR and all goodnesses of fit S are based on F^2^, conventional R-factors R 
 are based on F, with F set to zero for negative F^2^. The observed criterion 
 of F^2^ > 2sigma(F^2^) is used only for calculating _R_factor_obs etc. and is 
 not relevant to the choice of reflections for refinement.  R-factors based 
 on F^2^ are statistically about twice as large as those based on F, and R- 
 factors based on ALL data will be even larger. Large thermal motion in some 
 t-Bu groups results in disorder and some large associated peaks. 
 SADABS was used for data correction, hence Tmax/Tmin may differ slightly
 from expected values. SAINT was used for cell determination,hence su's may 
 be deflated.  
; 
 
_refine_ls_structure_factor_coef  Fsqd  
_refine_ls_matrix_type            full 
_refine_ls_weighting_scheme 
 'calc w=1/[\s^2^(Fo^2^)+(0.0669P)^2^+0.0000P] where P=(Fo^2^+2Fc^2^)/3' 
_atom_sites_solution_primary      direct 
_atom_sites_solution_secondary    difmap 
_atom_sites_solution_hydrogens    geom 
_refine_ls_hydrogen_treatment     'fixed' 
_refine_ls_extinction_method      none 
_refine_ls_extinction_coef        ? 
_refine_ls_number_reflns          2697 
_refine_ls_number_parameters      175 
_refine_ls_number_restraints      0 
_refine_ls_R_factor_all           0.0661 
_refine_ls_R_factor_obs           0.0437 
_refine_ls_wR_factor_all          0.1103 
_refine_ls_wR_factor_obs          0.1027 
_refine_ls_goodness_of_fit_all    0.974 
_refine_ls_goodness_of_fit_obs    1.051 
_refine_ls_restrained_S_all       0.974 
_refine_ls_restrained_S_obs       1.051 
_refine_ls_shift/esd_max          0.000 
_refine_ls_shift/esd_mean         0.000 
 
loop_ 
 _atom_site_label 
 _atom_site_type_symbol 
 _atom_site_fract_x 
 _atom_site_fract_y 
 _atom_site_fract_z 
 _atom_site_U_iso_or_equiv 
 _atom_site_thermal_displace_type 
 _atom_site_occupancy 
 _atom_site_calc_flag 
 _atom_site_refinement_flags 
 _atom_site_disorder_group 
Mo1 Mo 0.07309(3) 0.0000 0.51483(5) 0.0156(2) Uani 1 d S . 
P1 P 0.0000 0.13917(7) 0.5000 0.0194(4) Uani 1 d S . 
Si1 Si 0.24666(11) 0.0000 0.7909(2) 0.0301(5) Uani 1 d S . 
N1 N 0.0827(3) 0.0000 0.3272(4) 0.0177(11) Uani 1 d S . 
O1 O 0.1434(2) 0.0000 0.7149(4) 0.0167(9) Uani 1 d S . 
O2 O 0.2760(3) -0.0807(3) 0.8485(6) 0.0184(12) Uani 0.50 d P . 
O2A O 0.2798(3) -0.0376(2) 0.9273(5) 0.0182(12) Uani 0.50 d P . 
O3 O 0.2986(2) 0.0000 0.6750(4) 0.0244(10) Uani 1 d S . 
O4 O 0.0843(2) 0.10002(12) 0.5310(3) 0.0192(6) Uani 1 d . . 
O5 O -0.0113(2) 0.18349(13) 0.3705(3) 0.0294(8) Uani 1 d . . 
C1 C 0.0249(4) 0.0000 0.1853(6) 0.0271(15) Uani 1 d S . 
H1A H -0.0371(4) 0.0000 0.1860(6) 0.041 Uiso 1 calc SR . 
H1B H 0.0365(4) -0.0382 0.1371(6) 0.041 Uiso 0.50 calc PR . 
H1C H 0.0365(4) 0.0382 0.1371(6) 0.041 Uiso 0.50 calc PR . 
C2 C 0.1757(4) 0.0000 0.3294(6) 0.030(2) Uani 1 d S . 
H2A H 0.2135(4) 0.0000 0.4257(6) 0.045 Uiso 1 calc SR . 
H2B H 0.1880(4) 0.0382 0.2820(6) 0.045 Uiso 0.50 calc PR . 
H2C H 0.1880(4) -0.0382 0.2820(6) 0.045 Uiso 0.50 calc PR . 
C3 C 0.2579(3) -0.1109(2) 0.9495(5) 0.0354(12) Uani 1 d . . 
C4 C 0.2610(7) -0.1881(5) 0.9173(11) 0.043(3) Uiso 0.50 d P . 
H4A H 0.2207(7) -0.1974(5) 0.8251(11) 0.064 Uiso 0.50 calc PR . 
H4B H 0.2425(7) -0.2123(5) 0.9874(11) 0.064 Uiso 0.50 calc PR . 
H4C H 0.3215(7) -0.2003(5) 0.9203(11) 0.064 Uiso 0.50 calc PR . 
C4A C 0.2809(7) -0.1426(5) 0.8267(11) 0.046(3) Uiso 0.50 d P . 
H4A1 H 0.2311(7) -0.1376(5) 0.7424(11) 0.069 Uiso 0.50 calc PR . 
H4A2 H 0.2924(7) -0.1882(5) 0.8461(11) 0.069 Uiso 0.50 calc PR . 
H4A3 H 0.3339(7) -0.1224(5) 0.8132(11) 0.069 Uiso 0.50 calc PR . 
C5 C 0.1632(3) -0.1081(2) 0.9499(5) 0.0408(13) Uani 1 d . . 
H5A H 0.1245(3) -0.1076(2) 0.8541(5) 0.061 Uiso 1 calc R . 
H5B H 0.1534(3) -0.0693(2) 0.9977(5) 0.061 Uiso 1 calc R . 
H5C H 0.1496(3) -0.1457(2) 0.9980(5) 0.061 Uiso 1 calc R . 
C6 C 0.3226(4) -0.1119(3) 1.0895(6) 0.063(2) Uani 1 d . . 
H6A H 0.3829(4) -0.1137(3) 1.0810(6) 0.095 Uiso 1 calc R . 
H6B H 0.3119(4) -0.1495(3) 1.1403(6) 0.095 Uiso 1 calc R . 
H6C H 0.3157(4) -0.0732(3) 1.1400(6) 0.095 Uiso 1 calc R . 
C7 C 0.3898(4) 0.0000 0.6769(7) 0.032(2) Uani 1 d S . 
C8 C 0.4531(4) 0.0000 0.8236(7) 0.041(2) Uani 1 d S . 
H8A H 0.4334(4) 0.0317 0.8799(7) 0.062 Uiso 0.50 calc PR . 
H8B H 0.5130(4) 0.0107 0.8204(7) 0.062 Uiso 0.50 calc PR . 
H8C H 0.4535(4) -0.0424 0.8649(7) 0.062 Uiso 0.50 calc PR . 
C9 C 0.3944(6) 0.0717(5) 0.6193(10) 0.033(2) Uiso 0.50 d P . 
H9A H 0.3799(6) 0.1025(5) 0.6827(10) 0.050 Uiso 0.50 calc PR . 
H9B H 0.3517(6) 0.0760(5) 0.5270(10) 0.050 Uiso 0.50 calc PR . 
H9C H 0.4543(6) 0.0802(5) 0.6132(10) 0.050 Uiso 0.50 calc PR . 
C9A C 0.4110(7) 0.0444(5) 0.5834(10) 0.035(2) Uiso 0.50 d P . 
H9A1 H 0.4041(7) 0.0880(5) 0.6136(10) 0.053 Uiso 0.50 calc PR . 
H9A2 H 0.3710(7) 0.0377(5) 0.4898(10) 0.053 Uiso 0.50 calc PR . 
H9A3 H 0.4724(7) 0.0377(5) 0.5826(10) 0.053 Uiso 0.50 calc PR . 
C10 C 0.0583(3) 0.2211(2) 0.3332(5) 0.0413(13) Uani 1 d . . 
C11 C 0.1179(4) 0.2547(2) 0.4586(6) 0.053(2) Uani 1 d . . 
H11A H 0.0824(4) 0.2835(2) 0.4976(6) 0.079 Uiso 1 calc R . 
H11B H 0.1628(4) 0.2793(2) 0.4310(6) 0.079 Uiso 1 calc R . 
H11C H 0.1471(4) 0.2230(2) 0.5286(6) 0.079 Uiso 1 calc R . 
C12 C 0.1094(4) 0.1759(3) 0.2686(7) 0.071(2) Uani 1 d . . 
H12A H 0.0686(4) 0.1551(3) 0.1879(7) 0.106 Uiso 1 calc R . 
H12B H 0.1385(4) 0.1434(3) 0.3367(7) 0.106 Uiso 1 calc R . 
H12C H 0.1542(4) 0.1998(3) 0.2391(7) 0.106 Uiso 1 calc R . 
C13 C 0.0040(4) 0.2692(3) 0.2281(6) 0.069(2) Uani 1 d . . 
H13A H -0.0281(4) 0.2976(3) 0.2742(6) 0.104 Uiso 1 calc R . 
H13B H -0.0385(4) 0.2463(3) 0.1526(6) 0.104 Uiso 1 calc R . 
H13C H 0.0439(4) 0.2945(3) 0.1903(6) 0.104 Uiso 1 calc R . 
 
loop_ 
 _atom_site_aniso_label 
 _atom_site_aniso_U_11 
 _atom_site_aniso_U_22 
 _atom_site_aniso_U_33 
 _atom_site_aniso_U_23 
 _atom_site_aniso_U_13 
 _atom_site_aniso_U_12 
Mo1 0.0176(3) 0.0148(3) 0.0129(3) 0.000 0.0022(2) 0.000 
P1 0.0223(9) 0.0117(8) 0.0211(8) 0.000 0.0014(7) 0.000 
Si1 0.0154(9) 0.0574(13) 0.0158(9) 0.000 0.0017(7) 0.000 
N1 0.021(3) 0.023(3) 0.010(2) 0.000 0.005(2) 0.000 
O1 0.011(2) 0.021(2) 0.018(2) 0.000 0.004(2) 0.000 
O2 0.018(3) 0.017(3) 0.018(3) 0.002(3) 0.002(2) 0.000(2) 
O2A 0.016(3) 0.019(3) 0.015(3) 0.002(3) -0.002(2) 0.001(2) 
O3 0.014(2) 0.041(3) 0.017(2) 0.000 0.003(2) 0.000 
O4 0.014(2) 0.0170(15) 0.024(2) -0.0007(12) 0.0018(13) -0.0019(11) 
O5 0.032(2) 0.021(2) 0.029(2) 0.0095(13) -0.0009(14) -0.0027(14) 
C1 0.021(3) 0.047(4) 0.012(3) 0.000 0.003(3) 0.000 
C2 0.021(4) 0.049(4) 0.016(3) 0.000 0.000(3) 0.000 
C3 0.037(3) 0.038(3) 0.026(3) -0.003(2) 0.001(2) 0.012(2) 
C5 0.037(3) 0.044(3) 0.040(3) 0.020(2) 0.008(2) -0.005(2) 
C6 0.046(4) 0.088(5) 0.043(4) 0.033(3) -0.007(3) -0.010(3) 
C7 0.025(4) 0.045(4) 0.025(4) 0.000 0.006(3) 0.000 
C8 0.018(4) 0.057(5) 0.044(5) 0.000 0.001(3) 0.000 
C10 0.043(3) 0.031(3) 0.046(3) 0.020(2) 0.005(3) -0.014(2) 
C11 0.047(3) 0.041(3) 0.058(4) 0.022(3) -0.005(3) -0.017(3) 
C12 0.089(5) 0.061(4) 0.082(5) 0.015(4) 0.056(4) -0.017(4) 
C13 0.065(4) 0.057(4) 0.064(4) 0.046(3) -0.015(3) -0.021(3) 
 
_geom_special_details 
; 
 All esds (except the esd in the dihedral angle between two l.s. planes) 
 are estimated using the full covariance matrix.  The cell esds are taken 
 into account individually in the estimation of esds in distances, angles 
 and torsion angles; correlations between esds in cell parameters are only 
 used when they are defined by crystal symmetry.  An approximate (isotropic) 
 treatment of cell esds is used for estimating esds involving l.s. planes. 
; 
 
loop_ 
 _geom_bond_atom_site_label_1 
 _geom_bond_atom_site_label_2 
 _geom_bond_distance 
 _geom_bond_site_symmetry_2 
 _geom_bond_publ_flag 
Mo1 N1 1.939(4) . ? 
Mo1 O1 1.998(4) . ? 
Mo1 O4 2.105(3) . ? 
Mo1 O4 2.105(3) 6 ? 
Mo1 Mo1 2.2357(10) 5_556 ? 
P1 O4 1.515(3) 2_556 ? 
P1 O4 1.515(3) . ? 
P1 O5 1.569(3) 2_556 ? 
P1 O5 1.569(3) . ? 
Si1 O2A 1.537(5) 6 ? 
Si1 O2A 1.537(5) . ? 
Si1 O1 1.585(4) . ? 
Si1 O3 1.610(4) . ? 
Si1 O2 1.804(5) . ? 
Si1 O2 1.804(5) 6 ? 
N1 C1 1.455(7) . ? 
N1 C2 1.459(7) . ? 
O2 C3 1.298(7) . ? 
O2A O2A 1.574(10) 6 ? 
O2A C3 1.604(7) . ? 
O3 C7 1.432(7) . ? 
O5 C10 1.484(5) . ? 
C3 C6 1.481(6) . ? 
C3 C5 1.495(6) . ? 
C3 C4A 1.538(11) . ? 
C3 C4 1.652(10) . ? 
C7 C9A 1.430(10) 6 ? 
C7 C9A 1.430(10) . ? 
C7 C8 1.524(9) . ? 
C7 C9 1.620(9) . ? 
C7 C9 1.620(9) 6 ? 
C10 C12 1.508(7) . ? 
C10 C11 1.511(7) . ? 
C10 C13 1.531(7) . ? 
 
loop_ 
 _geom_angle_atom_site_label_1 
 _geom_angle_atom_site_label_2 
 _geom_angle_atom_site_label_3 
 _geom_angle 
 _geom_angle_site_symmetry_1 
 _geom_angle_site_symmetry_3 
 _geom_angle_publ_flag 
N1 Mo1 O1 143.6(2) . . ? 
N1 Mo1 O4 92.67(7) . . ? 
O1 Mo1 O4 84.98(7) . . ? 
N1 Mo1 O4 92.67(7) . 6 ? 
O1 Mo1 O4 84.98(7) . 6 ? 
O4 Mo1 O4 168.94(14) . 6 ? 
N1 Mo1 Mo1 103.87(14) . 5_556 ? 
O1 Mo1 Mo1 112.49(11) . 5_556 ? 
O4 Mo1 Mo1 94.05(7) . 5_556 ? 
O4 Mo1 Mo1 94.05(7) 6 5_556 ? 
O4 P1 O4 114.5(2) 2_556 . ? 
O4 P1 O5 111.85(14) 2_556 2_556 ? 
O4 P1 O5 105.56(14) . 2_556 ? 
O4 P1 O5 105.56(14) 2_556 . ? 
O4 P1 O5 111.85(14) . . ? 
O5 P1 O5 107.4(2) 2_556 . ? 
O2A Si1 O2A 61.6(4) 6 . ? 
O2A Si1 O1 117.8(2) 6 . ? 
O2A Si1 O1 117.8(2) . . ? 
O2A Si1 O3 122.4(2) 6 . ? 
O2A Si1 O3 122.4(2) . . ? 
O1 Si1 O3 108.5(2) . . ? 
O2A Si1 O2 101.7(3) 6 . ? 
O2A Si1 O2 40.8(2) . . ? 
O1 Si1 O2 106.7(2) . . ? 
O3 Si1 O2 95.6(2) . . ? 
O2A Si1 O2 40.9(2) 6 6 ? 
O2A Si1 O2 101.7(3) . 6 ? 
O1 Si1 O2 106.7(2) . 6 ? 
O3 Si1 O2 95.6(2) . 6 ? 
O2 Si1 O2 139.2(4) . 6 ? 
C1 N1 C2 110.7(4) . . ? 
C1 N1 Mo1 138.9(4) . . ? 
C2 N1 Mo1 110.4(3) . . ? 
Si1 O1 Mo1 132.7(2) . . ? 
C3 O2 Si1 128.0(4) . . ? 
Si1 O2A O2A 59.2(2) . 6 ? 
Si1 O2A C3 125.7(4) . . ? 
O2A O2A C3 163.3(3) 6 . ? 
C7 O3 Si1 135.3(4) . . ? 
P1 O4 Mo1 118.28(15) . . ? 
C10 O5 P1 127.6(3) . . ? 
O2 C3 C6 120.4(5) . . ? 
O2 C3 C5 115.5(4) . . ? 
C6 C3 C5 114.1(4) . . ? 
O2 C3 C4A 54.8(5) . . ? 
C6 C3 C4A 120.2(6) . . ? 
C5 C3 C4A 119.2(6) . . ? 
O2 C3 O2A 47.1(3) . . ? 
C6 C3 O2A 91.7(4) . . ? 
C5 C3 O2A 102.6(4) . . ? 
C4A C3 O2A 101.0(5) . . ? 
O2 C3 C4 107.3(5) . . ? 
C6 C3 C4 97.0(5) . . ? 
C5 C3 C4 97.2(5) . . ? 
C4A C3 C4 52.6(5) . . ? 
O2A C3 C4 152.9(5) . . ? 
C9A C7 C9A 81.1(9) 6 . ? 
C9A C7 O3 114.7(6) 6 . ? 
C9A C7 O3 114.7(6) . . ? 
C9A C7 C8 115.2(6) 6 . ? 
C9A C7 C8 115.2(6) . . ? 
O3 C7 C8 112.6(5) . . ? 
C9A C7 C9 108.9(7) 6 . ? 
C9A C7 C9 28.1(4) . . ? 
O3 C7 C9 98.3(4) . . ? 
C8 C7 C9 105.2(4) . . ? 
C9A C7 C9 28.1(4) 6 6 ? 
C9A C7 C9 108.9(7) . 6 ? 
O3 C7 C9 98.3(4) . 6 ? 
C8 C7 C9 105.2(4) . 6 ? 
C9 C7 C9 136.1(8) . 6 ? 
O5 C10 C12 107.6(4) . . ? 
O5 C10 C11 111.2(4) . . ? 
C12 C10 C11 111.9(5) . . ? 
O5 C10 C13 102.6(4) . . ? 
C12 C10 C13 112.1(5) . . ? 
C11 C10 C13 111.0(4) . . ? 
 
_refine_diff_density_max    1.817 
_refine_diff_density_min   -1.160 
_refine_diff_density_rms    0.101 
